# Supplementary material for: Comparison of urine and blood NGAL for early prediction of delayed graft function in adult kidney transplant recipients: a meta-analysis of observational studies
Source: Springer Nature journal article supplement (doi:10.1186/s12882-019-1491-y), 2019-08-02
Supplement: MOESM1 [file 17034978]

Risk of Bias

Applicability Concerns

|                   | Risk of Bias      |            |                    |                 | Applicability Concerns |            |                    |
|-------------------|-------------------|------------|--------------------|-----------------|------------------------|------------|--------------------|
|                   | Patient Selection | Index Test | Reference Standard | Flow and Timing | Patient Selection      | Index Test | Reference Standard |
| Bataille (2011)   | +                 | +          | ?                  | -               | +                      | +          | ?                  |
| Cantaluppi (2015) | ?                 | +          | +                  | +               | ?                      | +          | +                  |
| Cui (2015)        | ?                 | +          | ?                  | -               | ?                      | +          | ?                  |
| Fonseca (2013)    | +                 | +          | +                  | +               | +                      | +          | +                  |
| Hall (2010)       | +                 | +          | +                  | +               | +                      | +          | +                  |
| Hollmen (2011)    | +                 | +          | +                  | +               | +                      | +          | +                  |
| Hollmen (2014)    | +                 | +          | +                  | +               | +                      | +          | +                  |
| Kanter (2013)     | ?                 | +          | +                  | +               | +                      | +          | +                  |
| Kusaka (2012)     | -                 | -          | +                  | +               | -                      | +          | +                  |
| Lacquaniti (2016) | +                 | +          | ?                  | -               | +                      | +          | ?                  |
| Lee (2012)        | -                 | +          | ?                  | ?               | ?                      | +          | +                  |
| Nieto-Ríos (2016) | +                 | +          | ?                  | +               | +                      | +          | ?                  |
| Parikh (2006)     | +                 | +          | +                  | +               | +                      | +          | +                  |
| Pezeshgani (2016) | ?                 | +          | ?                  | ?               | +                      | +          | ?                  |

High

Unclear

Low
