# Supplementary material for: Comparison of urine and blood NGAL for early prediction of delayed graft function in adult kidney transplant recipients: a meta-analysis of observational studies
Source: Springer Nature journal article supplement (doi:10.1186/s12882-019-1491-y), 2019-08-02

**a**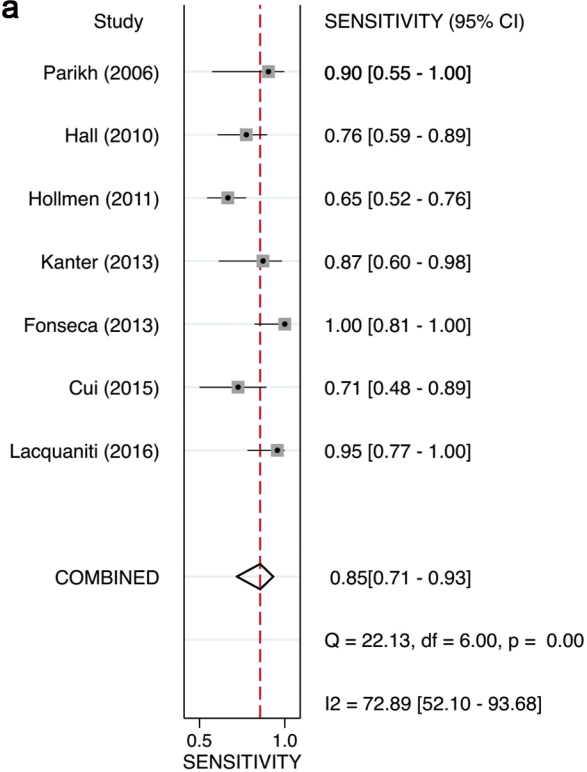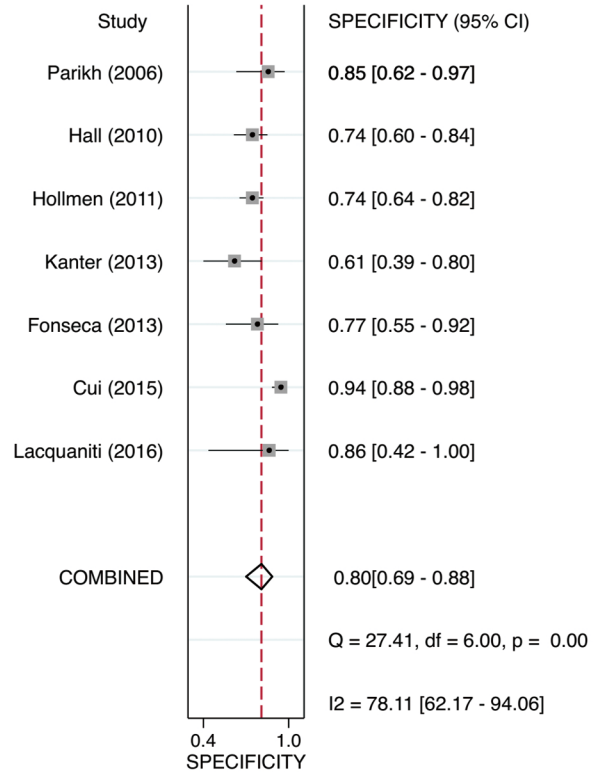**b**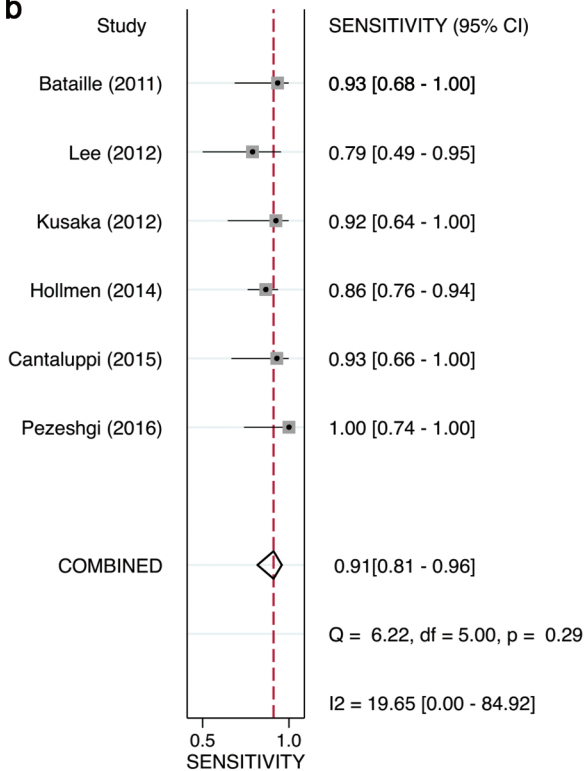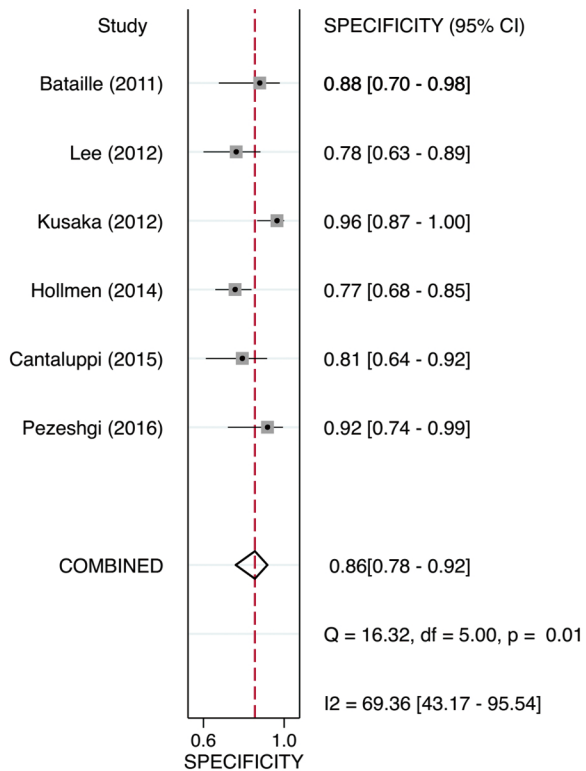

Supplement: MOESM3 [file 17034978]
